# Supplementary material
Source: PubMed Central journal article supplement (PMC5147536)
Supplement: NIHMS831191-supplement-Supplemental_Table.pdf [file NIHMS831191-supplement-Supplemental_Table.pdf]

## SUPPLEMENTAL MATERIAL

**Supplemental Table 1: Demographic and CVD risk factor characteristics of the total MESA cohort (N=6814) and the participants in this study (N=4196)**

|                       | MESA Cohort(N=6814) | Study Cohort(N=4196) | P value |
|-----------------------|---------------------|----------------------|---------|
| Age(yrs.)             | 62.3 ±10.2          | 61.8 ±10.2           | 0.02    |
| Female (%)            | 52.5                | 51.0                 | 0.01    |
| Body mass index       | 28.4 ±5.5           | 27.7± 4.9            | 0.21    |
| Race/Ethnicity (%)    |                     |                      | 0.001   |
| White                 | 38.0                | 39.4                 |         |
| Chinese               | 12.0                | 14.4                 |         |
| African American      | 28.0                | 22.9                 |         |
| Hispanic              | 22.0                | 23.3                 |         |
| Cigarette Smoking (%) |                     |                      | 0.01    |
| Never                 | 50.2                | 52.1                 |         |
| Former                | 36.6                | 35.6                 |         |
| Current               | 13.2                | 12.6                 |         |
| Blood Pressure        |                     |                      | 0.32    |
| Systolic              | 126.8 ±12.6         | 125.6± 21.4          |         |
| Diastolic             | 72.0± 10.3          | 71.7± 10.3           |         |
| Cholesterol           |                     |                      | 0.11    |
| Total                 | 194.0± 35.7         | 194.3 ±35.6          |         |
| LDL                   | 117.1± 31.4         | 117.0± 31.4          |         |
| HDL                   | 50.8± 14.8          | 50.9 ±14.8           |         |
| Triglycerides         | 132.0± 88.8         | 133.0± 87.2          |         |
| Diabetes Mellitus (%) | 12.9                | 11.9                 | 0.04    |
